# Supplementary material for: An Evaluation of the Genetic Structure of Geese Maintained in Poland on the Basis of Microsatellite Markers
Source: Animals (Basel). 2019 Sep 27;9(10):737. doi: 10.3390/ani9100737 (PMC6826841; doi:10.3390/ani9100737)
Supplement: Supplementary file 1 [file animals-09-00737-s001.xlsx]

## Sheet: Table S1. Genotyping data.
No. lab.	Material	Breed		LOCI
			Bca µ1	Bca µ1	TTUCG5	TTUCG5	CKW21	CKW21	Bca µ9	Bca µ9	Bca µ8	Bca µ8	Ans02	Ans02	Ans18	Ans18	Ans25	Ans25	CAUD-G013	CAUD-G013	CAUD-G007	CAUD-G007	Aal µ1	Aal µ1	Afa35	Afa35	CAUD-G012	CAUD-G012	Ans07	Ans07
G1	Plumage	BK	116	116	190	192	353	353	120	120	158	158	210	210	245	245	275	275	101	101	119	119	0	0	142	142	206	212	242	242
G2	Plumage	BK	116	116	188	190	353	371	108	120	154	154	210	210	245	245	265	275	95	95	119	119	83	87	142	142	212	212	242	242
G3	Plumage	BK	116	116	190	192	371	371	108	120	158	158	210	210	245	245	275	275	101	101	119	119	83	87	142	142	212	212	242	242
G4	Plumage	BK	116	116	188	194	353	371	106	118	158	158	210	210	245	245	271	271	95	95	119	119	83	85	142	142	212	212	242	242
G5	Plumage	BK	116	120	184	188	371	373	106	136	156	156	210	210	245	245	271	275	95	95	119	119	87	87	142	142	206	212	242	242
G6	Plumage	BK	116	120	190	192	371	371	120	120	156	158	210	210	245	245	271	275	95	95	119	119	83	83	142	142	212	212	242	242
G7	Plumage	BK	116	116	188	190	353	371	120	120	154	154	210	210	245	245	271	275	95	95	119	119	87	87	142	142	212	212	242	242
G8	Plumage	BK	116	116	184	188	353	373	108	120	156	156	210	210	245	245	275	275	95	95	119	119	83	87	142	142	212	212	242	242
G9	Plumage	BK	116	116	192	194	371	371	108	120	156	156	210	210	245	245	271	275	101	101	119	119	87	87	142	142	212	212	236	242
G10	Plumage	BK	116	116	186	190	371	371	120	120	154	154	210	210	245	245	265	271	95	95	119	119	85	85	142	142	212	212	242	242
G11	Plumage	BK	116	116	192	192	371	371	120	120	156	158	210	210	245	245	275	275	95	101	119	119	85	87	142	142	212	212	242	242
G12	Plumage	BK	116	116	188	192	371	371	120	120	158	158	210	210	245	245	265	275	95	101	119	119	83	87	142	142	212	212	242	242
G13	Plumage	BK	116	116	190	192	371	373	120	120	158	158	210	210	245	245	275	275	95	95	119	119	83	85	142	142	212	212	242	242
G14	Plumage	BK	116	116	192	192	371	371	120	120	158	158	210	210	245	245	271	275	101	101	119	119	87	87	142	142	212	212	242	242
G15	Plumage	BK	116	116	188	192	353	371	120	120	156	158	210	210	245	245	275	275	101	101	119	119	83	83	142	142	212	212	242	242
G16	Plumage	BK	116	116	190	190	371	373	120	136	154	158	210	210	245	245	265	275	95	101	119	119	83	87	142	142	212	212	236	242
G17	Plumage	BK	116	116	190	192	373	373	108	120	156	158	210	210	245	245	275	275	95	95	119	119	87	87	142	142	206	212	236	242
G18	Plumage	BK	116	116	188	192	367	371	120	120	156	156	210	210	245	245	265	275	101	101	119	119	87	87	142	142	212	212	236	242
G19	Plumage	BK	116	116	190	192	371	373	120	120	158	158	210	210	245	245	275	275	95	101	119	119	83	85	142	142	212	212	242	242
G20	Plumage	BK	116	116	188	192	371	373	120	120	154	158	210	210	245	245	275	275	101	101	119	119	85	87	142	142	206	212	242	242
G37	Plumage	Ki	116	116	186	190	371	371	120	136	158	158	210	210	245	245	265	275	95	101	115	119	85	87	142	142	206	216	240	240
G38	Plumage	Ki	116	116	186	190	371	371	120	136	158	158	210	210	245	245	265	275	95	101	115	119	85	87	142	142	206	216	240	240
G39	Plumage	Pd	114	116	182	186	371	371	108	120	156	156	210	210	245	245	271	275	95	101	119	119	85	87	142	142	206	212	240	240
G40	Plumage	Pd	114	116	182	186	371	371	108	120	156	156	210	210	245	245	271	275	95	101	119	119	85	87	142	142	206	212	240	240
G41	Plumage	Ga	114	114	176	198	371	375	108	120	154	162	210	210	245	245	269	271	89	95	115	123	83	83	154	158	202	210	242	242
G42	Plumage	Ga	114	114	176	198	371	375	108	120	154	162	210	210	245	245	269	271	89	95	115	123	83	83	154	158	202	210	242	242
G43	Plumage	Po	116	116	184	184	353	371	120	120	156	156	210	236	245	245	271	275	101	101	119	119	87	89	142	142	206	212	246	246
G44	Plumage	Po	116	116	184	184	353	371	120	120	156	156	210	236	245	245	271	275	101	101	119	119	87	89	142	142	206	212	246	246
G45	Plumage	Ry	114	116	186	192	371	371	120	120	156	156	210	210	245	245	271	275	95	101	119	119	87	87	142	142	212	216	242	242
G46	Plumage	Ry	114	116	186	192	371	371	120	120	156	156	210	210	245	245	271	275	95	101	119	119	87	87	142	142	212	216	242	242
G47	Plumage	La	114	116	194	194	371	371	120	120	156	156	210	210	245	245	275	275	95	101	119	119	87	89	142	142	212	216	242	242
G48	Plumage	La	114	116	194	194	371	371	120	120	156	158	210	210	245	245	275	275	95	101	119	119	87	89	142	142	212	216	242	242
G49	Plumage	Lu	116	122	184	186	371	371	120	136	156	156	210	216	245	245	265	265	95	95	119	123	87	87	142	142	202	216	242	242
G50	Plumage	Lu	114	116	188	192	371	371	108	120	156	156	210	216	245	245	271	273	95	101	115	123	83	87	142	142	202	202	242	242
G51	Plumage	Lu	116	122	188	190	371	371	120	136	156	158	210	216	245	245	265	271	101	101	119	119	85	87	142	142	216	216	240	242
G52	Plumage	Lu	114	116	190	192	371	371	120	120	158	158	210	210	245	245	271	275	101	101	119	119	87	87	142	142	206	216	242	242
G53	Plumage	Lu	116	120	184	184	357	373	120	120	156	158	210	210	245	245	271	275	101	101	119	119	81	85	142	142	212	212	242	242
G54	Plumage	Lu	116	120	188	190	367	373	120	136	156	158	210	210	245	245	265	275	95	101	115	119	81	87	142	142	202	216	242	242
G55	Plumage	Lu	114	116	188	188	367	371	120	120	156	158	210	210	233	245	265	275	95	95	119	123	87	87	142	142	216	216	242	242
G56	Plumage	Su	120	120	182	192	351	371	120	120	156	158	210	210	245	245	271	275	101	101	119	119	87	87	142	142	212	212	246	246
G57	Plumage	Su	114	116	176	188	351	371	120	120	156	158	210	210	245	245	265	275	95	95	119	119	87	87	142	142	212	216	242	242
G58	Plumage	Su	116	116	188	192	365	371	120	120	156	156	210	210	245	245	265	275	95	101	119	119	85	87	142	142	212	212	250	250
G59	Plumage	Su	114	120	192	192	353	357	120	136	156	158	210	210	245	245	265	265	95	95	115	119	85	87	142	142	212	212	242	242
G60	Plumage	Su	114	116	192	192	351	365	120	120	156	156	210	210	245	245	265	271	101	101	119	119	85	87	142	142	212	212	242	242
G61	Plumage	Su	116	116	176	188	351	371	120	120	156	158	210	210	245	245	271	275	95	95	119	119	85	85	142	142	206	212	242	242
G62	Plumage	Su	120	120	188	192	371	371	120	120	156	158	210	210	245	245	271	275	101	101	119	119	85	87	142	142	212	212	242	242
G63	Plumage	Ka	116	116	190	190	357	371	136	136	156	158	210	210	245	245	265	275	95	101	119	119	87	87	134	142	206	212	242	242
G64	Plumage	Ka	116	124	190	192	361	373	120	120	156	158	210	218	245	245	265	275	101	101	119	119	87	87	142	142	206	212	242	242
G65	Plumage	Ka	116	116	188	190	357	371	108	136	156	158	210	210	245	245	265	265	95	101	119	119	87	87	142	142	212	218	242	242
G66	Plumage	Ka	116	120	184	190	371	373	120	120	158	158	210	210	237	245	275	275	95	101	119	119	87	87	134	142	206	212	242	242
G67	Plumage	Ka	116	120	184	186	361	371	120	120	156	158	210	210	245	245	271	275	101	101	119	119	85	87	142	142	206	212	242	242
G68	Plumage	Ka	114	116	176	192	353	373	118	120	158	158	210	210	245	245	271	275	101	101	119	119	87	87	134	142	212	212	242	242
G69	Plumage	Ka	116	116	190	190	353	357	120	136	156	156	210	210	245	245	265	275	95	95	119	119	87	87	142	142	206	212	242	242
G70	Plumage	Ro	116	120	184	184	373	373	120	136	158	158	210	210	245	245	265	271	101	101	119	119	87	87	142	142	212	212	242	242
G71	Plumage	Ro	116	116	190	192	371	371	108	108	156	158	210	210	245	245	265	265	95	101	119	119	85	87	142	142	206	212	242	242
G72	Plumage	Ro	116	116	184	194	371	373	108	120	156	158	210	210	245	245	271	275	101	101	119	119	83	85	142	142	212	212	242	242
G73	Plumage	Ro	116	116	188	194	371	371	120	136	158	158	210	210	237	245	265	271	95	101	119	119	87	87	142	142	212	212	242	242
G74	Plumage	Ro	116	116	188	192	371	371	120	120	158	158	210	234	245	245	265	275	95	101	119	119	85	87	142	142	212	212	240	240
G75	Plumage	Ro	116	116	188	192	367	371	120	120	156	158	210	234	245	245	265	275	95	95	119	119	83	83	142	142	212	212	242	242
G76	Plumage	Sl	116	116	184	188	371	371	108	120	156	158	210	210	245	245	265	275	95	101	119	119	87	87	142	142	212	212	242	242
G77	Plumage	Sl	116	116	184	192	371	371	120	120	156	156	210	210	245	245	273	275	95	101	115	119	87	89	142	142	206	216	240	240
G78	Plumage	Sl	116	116	176	192	353	371	120	120	156	158	210	210	233	245	271	275	95	95	119	119	85	87	142	142	206	212	242	246
G79	Plumage	Sl	116	120	190	192	353	371	120	120	156	158	210	210	245	245	275	275	95	101	119	119	87	87	142	142	206	212	242	242
G80	Plumage	Sl	116	120	184	194	353	371	108	120	158	162	210	210	233	233	275	275	95	101	119	119	87	87	142	142	212	212	246	246
G81	Plumage	Sl	116	116	184	192	371	371	120	120	156	156	210	210	233	233	271	275	101	101	119	119	87	87	142	142	212	216	240	240
G82	Plumage	Sl	116	120	192	198	367	371	120	120	158	158	210	210	245	245	275	275	101	101	119	119	87	87	142	142	212	216	242	242
G83	Plumage	Sl	114	116	184	192	353	371	120	120	156	156	210	210	233	233	275	275	95	95	119	119	85	87	142	142	206	206	242	242
G84	Plumage	Ku	116	120	198	198	361	361	108	120	162	162	226	228	247	247	269	269	95	95	119	119	79	83	138	158	206	214	236	236
G85	Plumage	Ku	116	116	198	198	365	365	108	108	162	162	218	228	247	247	269	273	95	95	119	123	83	94	146	158	206	214	236	236
G86	Plumage	Ku	116	116	198	256	365	365	120	120	162	162	218	228	247	247	269	273	89	95	119	123	83	83	146	158	206	216	236	236
G87	Plumage	Ku	116	116	198	256	365	365	106	106	162	162	226	228	247	247	269	269	95	95	119	123	79	87	142	142	216	216	236	236
G88	Plumage	Ku	116	120	176	198	363	365	106	106	162	162	228	230	247	247	265	269	89	95	119	119	79	81	142	146	216	216	236	236
G89	Plumage	Ku	116	116	198	198	365	365	106	118	162	162	218	226	247	247	269	269	95	95	123	123	79	83	138	150	210	210	236	236
G90	Plumage	Ku	116	116	198	198	361	365	108	108	154	162	218	226	247	247	269	273	89	95	119	123	79	83	142	150	214	214	236	240
G001	Plumage	BK	116	116	190	190	353	371	120	130	158	158	210	210	245	245	265	271	95	101	119	119	85	87	142	142	212	212	242	242
G002	Plumage	BK	116	116	184	188	353	371	120	120	158	158	210	210	245	245	275	275	95	95	119	119	83	87	142	142	212	212	242	242
G003	Plumage	BK	116	120	184	188	353	371	108	108	156	158	210	210	245	245	265	275	95	101	119	119	85	87	142	142	212	212	242	242
G004	Plumage	BK	116	116	190	190	353	371	120	120	158	158	210	210	245	245	271	275	95	101	119	119	83	87	142	142	206	212	236	236
G005	Plumage	BK	116	116	192	192	371	373	120	120	158	158	210	210	245	245	271	275	95	95	119	119	85	87	142	142	212	212	242	242
G006	Plumage	BK	116	116	188	192	369	371	108	120	156	158	210	210	245	245	275	277	101	101	119	119	85	87	142	142	212	212	236	236
G007	Plumage	BK	116	116	186	190	371	373	108	120	156	158	210	210	245	245	275	277	95	101	119	119	87	87	142	142	212	212	242	242
G008	Plumage	BK	116	116	190	190	371	371	108	120	156	158	210	210	245	245	265	277	95	95	119	119	87	87	142	142	212	212	242	242
G009	Plumage	BK	116	116	184	190	371	373	120	136	156	156	210	210	245	245	277	277	95	95	119	119	87	87	142	142	212	212	242	242
G010	Plumage	BK	116	116	188	192	371	373	120	120	158	158	210	210	245	245	265	271	95	101	119	119	87	87	142	142	212	212	242	242
G011	Plumage	BK	116	116	190	192	371	371	108	136	156	158	210	210	245	245	265	277	101	101	119	119	87	87	142	142	212	212	242	242
G012	Plumage	BK	116	116	184	190	371	373	120	120	158	158	210	210	245	245	275	275	95	101	119	119	87	87	142	142	206	212	242	242
G013	Plumage	BK	116	116	190	192	353	353	120	120	154	154	210	210	245	245	265	265	95	95	119	119	87	87	142	142	212	212	242	242
G014	Plumage	BK	116	116	188	190	353	369	120	120	154	158	210	210	245	245	271	275	101	101	119	119	83	87	142	142	212	212	242	242
G015	Plumage	BK	116	120	188	190	371	373	120	136	158	158	210	210	245	245	275	275	101	101	119	119	83	85	142	142	212	212	242	242
G016	Plumage	BK	116	116	190	192	353	369	120	120	154	154	210	210	245	245	275	275	95	101	119	119	85	85	142	142	212	212	242	242
G017	Plumage	BK	116	116	188	190	353	371	108	108	158	158	210	210	245	245	271	275	95	95	119	119	85	87	142	142	212	212	242	242
G018	Plumage	BK	116	116	190	192	353	371	108	120	156	158	210	210	245	245	265	271	95	95	119	119	85	87	142	142	206	212	236	236
G019	Plumage	BK	116	116	188	192	367	371	120	120	154	158	210	210	245	245	275	275	95	101	119	119	87	87	142	142	212	212	242	242
G020	Plumage	BK	116	116	188	192	371	371	120	120	158	158	210	210	245	245	275	275	95	101	123	123	83	87	142	142	212	212	236	236
G021	Plumage	BK	116	116	192	192	371	373	120	120	156	158	210	210	245	245	275	275	95	101	119	119	85	87	142	142	212	212	242	242
G022	Plumage	BK	116	116	192	192	371	371	120	120	158	158	210	210	245	245	271	275	101	101	119	119	87	87	142	142	212	212	236	236
G023	Plumage	BK	116	116	190	192	353	371	120	120	154	156	210	210	245	245	275	275	95	101	119	119	87	87	142	142	212	212	242	242
G024	Plumage	BK	116	116	190	190	353	371	120	120	158	158	210	210	245	245	275	275	95	101	119	119	85	87	142	142	212	212	242	242
G025	Plumage	BK	116	116	190	192	371	373	120	120	154	154	210	210	245	245	265	275	95	101	119	119	83	87	142	142	212	212	242	242
G026	Plumage	BK	116	116	188	190	353	371	120	120	156	158	210	210	245	245	265	275	95	101	119	119	87	87	142	142	206	212	242	242
G027	Plumage	BK	116	116	190	190	373	373	120	120	156	156	210	210	245	245	265	275	101	101	119	119	87	87	142	142	212	212	242	242
G028	Plumage	BK	116	116	190	190	371	373	120	120	156	158	210	210	245	245	275	275	95	101	119	119	85	85	142	142	212	212	242	242
G029	Plumage	BK	116	116	188	192	371	373	120	120	158	158	210	210	245	245	265	275	101	101	119	119	87	87	142	142	212	212	242	242
G030	Plumage	BK	116	116	190	192	353	373	120	136	156	156	210	210	245	245	265	265	101	101	119	119	85	85	142	142	206	212	242	242
G031	Plumage	BK	116	116	190	192	367	371	120	120	156	158	210	210	245	245	265	275	101	101	119	119	83	87	142	142	212	212	242	242
G032	Plumage	BK	116	116	190	192	353	373	120	120	154	158	210	210	245	245	265	275	95	101	119	119	83	85	142	142	212	212	242	242
G033	Plumage	BK	116	116	190	190	353	373	120	120	154	156	210	210	245	245	275	277	101	101	119	119	87	87	142	142	212	212	242	242
G034	Plumage	BK	116	116	188	190	371	373	120	120	156	158	210	210	245	245	265	265	95	101	119	119	85	85	142	142	212	212	242	242
G035	Plumage	BK	116	116	190	192	372	372	120	120	154	156	210	210	245	245	275	275	95	101	119	119	87	87	142	142	212	212	242	242
G036	Plumage	BK	116	116	188	190	371	371	108	120	154	154	210	210	245	245	275	275	95	101	119	119	87	87	142	142	212	212	242	242
G174	Plumage	Ki	116	120	190	194	353	357	108	136	156	156	210	210	245	245	269	275	101	101	119	119	85	87	142	142	212	216	246	246
G175	Plumage	Ki	116	116	186	190	377	377	136	136	156	156	210	210	243	247	269	275	101	101	119	123	87	87	142	146	206	212	242	242
G176	Plumage	Ki	124	124	184	190	357	371	136	136	156	158	210	210	237	237	275	275	95	101	119	119	87	87	142	142	216	216	246	246
G177	Plumage	Ki	120	124	186	190	371	377	108	136	158	162	210	210	245	245	265	265	95	95	119	119	85	85	142	142	206	206	242	242
G178	Plumage	Ki	120	120	190	190	353	371	132	136	156	158	210	210	245	245	269	275	95	101	119	119	85	87	142	142	212	216	246	246
G179	Plumage	Ki	116	116	184	190	371	371	136	136	158	162	210	210	233	233	265	269	95	101	119	119	85	85	142	142	206	212	242	242
G180	Plumage	Ki	120	124	190	202	371	371	108	120	158	158	210	210	237	237	275	275	95	101	119	123	85	87	142	200	212	216	246	246
G181	Plumage	Ki	116	120	184	188	353	357	108	120	156	158	210	242	233	233	265	269	95	101	119	119	85	85	142	142	212	212	242	242
G182	Plumage	Lu	116	116	184	192	371	373	120	120	156	158	210	210	245	245	271	275	95	95	119	119	87	87	142	142	206	216	242	242
G183	Plumage	Lu	116	116	188	192	371	371	108	128	158	158	210	216	245	245	275	275	95	101	119	119	83	87	142	142	219	219	242	242
G184	Plumage	Lu	114	116	190	192	371	371	108	120	158	158	210	210	245	245	271	275	101	101	115	119	83	87	142	200	216	216	242	242
G185	Plumage	Pd	114	116	176	186	371	373	120	128	156	156	210	218	245	245	271	275	101	101	119	119	87	87	142	142	206	212	246	246
G186	Plumage	Pd	114	116	188	190	375	375	120	120	156	156	210	210	233	233	275	275	101	101	119	119	85	85	142	142	206	216	242	242
G187	Plumage	Pd	114	116	186	186	371	371	120	136	156	156	210	210	233	233	275	275	101	101	119	119	85	87	134	142	206	216	246	246
G188	Plumage	Pd	116	116	188	190	357	371	108	120	156	156	210	210	233	245	265	275	95	101	119	119	87	87	142	142	206	212	242	246
G189	Plumage	Pd	114	114	182	190	353	375	120	136	156	156	210	210	245	245	271	275	101	101	119	119	87	87	142	142	212	212	242	242
G190	Plumage	Pd	116	120	184	190	371	375	120	120	156	158	210	210	245	245	275	275	95	101	119	119	87	87	142	142	212	212	242	246
G191	Plumage	Pd	116	116	184	190	353	369	120	120	156	158	210	210	245	245	275	275	101	101	119	119	87	87	142	142	206	212	242	242
G192	Plumage	Pd	116	116	188	190	353	375	120	136	156	156	210	218	245	245	271	275	101	101	119	119	85	87	142	142	206	212	246	246
G193	Plumage	Ga	114	116	176	188	361	361	120	120	158	158	228	228	247	247	275	275	89	95	119	119	81	83	146	200	212	214	242	242
G194	Plumage	Ga	116	116	176	176	351	375	108	108	154	158	210	216	247	247	271	271	95	95	123	123	83	87	146	146	212	214	242	242
G195	Plumage	Ga	116	116	176	198	351	351	108	108	154	154	218	226	247	247	275	275	89	101	119	123	83	87	142	146	212	214	242	242
G196	Plumage	Ga	116	116	176	200	351	367	108	120	154	156	218	218	247	247	271	275	95	95	115	119	83	83	142	200	210	214	242	242
G197	Plumage	Ga	116	116	176	176	361	375	108	108	156	156	210	218	247	247	271	275	89	95	115	123	83	85	142	146	212	214	242	242
G198	Plumage	Ga	116	116	176	176	351	361	108	120	156	162	210	218	247	247	271	271	89	95	119	123	83	83	142	146	214	214	242	242
G199	Plumage	Ga	116	116	176	198	351	351	108	108	156	162	216	218	247	247	269	271	89	89	119	123	81	83	146	146	212	214	242	242
G200	Plumage	Ga	116	116	176	176	351	351	108	120	154	156	218	218	247	247	271	271	95	101	119	119	83	87	142	142	214	214	236	236
G201	Plumage	Ry	116	120	192	194	371	371	120	120	156	158	210	210	245	245	271	275	101	101	119	119	87	87	142	142	206	212	242	242
G202	Plumage	Ry	120	122	190	192	371	371	120	120	156	158	210	210	245	245	265	275	95	101	119	119	87	87	142	142	206	212	242	242
G203	Plumage	Ry	120	122	186	190	371	371	120	120	156	158	210	210	233	245	271	271	95	101	119	119	85	87	142	142	212	216	242	242
G204	Plumage	Ry	116	116	192	194	371	371	120	120	156	156	210	236	245	245	271	271	95	101	119	119	87	89	142	142	212	216	246	246
G205	Plumage	Ry	116	120	186	194	371	371	108	120	156	156	210	210	245	245	271	271	95	101	119	119	87	87	142	142	206	212	242	242
G206	Plumage	Ry	116	116	190	190	371	371	120	120	156	158	210	210	245	245	271	275	95	95	119	119	87	87	142	142	212	216	242	242
G207	Plumage	Ry	116	116	186	192	353	373	120	120	156	158	210	210	245	245	269	275	95	101	119	123	85	87	142	142	206	206	242	242
G208	Plumage	Ry	116	116	190	192	353	353	120	120	156	158	236	242	245	245	269	275	95	101	119	119	87	89	142	142	206	216	246	246
G209	Plumage	Po	116	116	184	184	371	371	120	120	156	158	210	210	245	245	271	271	101	101	119	119	87	87	142	142	206	212	242	242
G210	Plumage	Po	116	116	192	194	371	371	120	120	156	158	210	210	245	245	271	271	95	101	119	119	87	87	142	142	212	216	246	246
G211	Plumage	Po	114	116	184	188	371	371	120	120	156	156	210	236	245	245	271	271	101	101	119	119	87	87	142	142	212	212	246	246
G212	Plumage	Po	116	124	176	190	367	373	120	136	156	156	210	220	245	245	271	275	101	101	119	119	87	87	142	142	206	206	242	242
G213	Plumage	Po	116	116	190	192	367	373	108	120	156	158	210	210	245	245	265	271	95	95	119	119	87	87	142	142	206	206	242	242
G214	Plumage	Po	116	116	186	190	367	371	120	120	156	156	210	210	233	233	265	271	95	101	119	119	87	89	142	142	212	212	246	246
G223	Plumage	Ro	116	116	184	192	371	371	120	120	156	156	210	210	233	233	271	275	101	101	115	119	87	87	142	142	212	212	242	242
G224	Plumage	Ro	116	120	184	192	353	371	120	120	158	162	210	210	245	245	271	275	95	95	119	119	87	87	138	142	206	212	246	246
G225	Plumage	Ro	116	116	184	194	371	371	120	120	156	158	210	236	245	245	271	275	95	101	119	119	85	87	142	142	206	206	242	242
G226	Plumage	La	116	116	190	194	371	373	120	120	156	158	210	224	245	245	265	275	101	101	119	119	87	87	142	142	206	212	242	242
G227	Plumage	La	116	116	194	196	371	373	120	120	156	156	210	210	245	245	275	275	101	101	119	119	85	89	142	142	206	216	242	242
G228	Plumage	La	114	116	190	190	371	371	120	120	156	156	210	210	245	245	275	275	101	101	119	119	87	87	142	142	212	216	242	242
G229	Plumage	La	116	120	190	200	367	375	120	120	156	156	210	224	245	245	275	275	101	101	119	119	83	83	142	142	212	212	242	242
G230	Plumage	La	116	116	190	194	367	371	120	120	156	158	210	224	245	245	275	275	101	101	119	119	87	87	142	142	206	216	242	242
G231	Plumage	La	116	116	188	190	367	373	120	120	156	156	210	210	245	245	271	275	101	101	119	119	85	89	142	142	212	218	242	242
G232	Plumage	La	116	116	190	192	371	373	120	120	156	156	210	210	245	245	275	275	95	101	119	119	87	87	142	142	218	218	242	242
G233	Plumage	La	114	114	190	192	375	375	120	120	156	158	210	210	245	245	275	275	95	101	119	119	87	89	142	142	212	212	242	242
G235	Plumage	Sl	116	120	184	186	353	353	120	120	156	156	210	210	245	245	275	275	101	101	119	119	87	87	142	142	214	214	242	242
G236	Plumage	Sl	116	116	188	194	371	373	120	120	156	156	210	210	245	245	265	265	101	101	119	119	87	87	142	142	212	212	240	240
G237	Plumage	Sl	116	116	184	192	353	367	108	120	156	156	210	210	245	245	265	275	95	101	119	119	87	87	142	142	212	212	242	242
G238	Plumage	Ku	116	116	176	176	361	365	108	108	162	162	218	226	245	245	269	269	95	95	119	119	79	87	204	204	216	216	240	240
G239	Plumage	Ku	116	116	198	198	361	365	108	120	162	162	218	226	245	245	269	269	89	95	119	123	81	87	142	146	214	214	240	240
G240	Plumage	Ku	116	116	256	256	361	371	108	120	162	162	226	228	245	245	269	269	89	89	119	123	79	81	150	150	216	216	236	236
G0215	Plumage	Po	114	116	192	192	371	371	120	120	156	158	210	210	245	245	271	275	95	95	119	119	87	87	142	142	206	212	246	246
G0216	Plumage	Po	116	124	176	194	353	367	120	120	156	158	210	210	245	245	265	271	101	101	119	119	87	87	142	142	206	212	242	242
G0217	Plumage	Su	116	116	186	190	371	371	120	136	156	158	210	210	233	233	271	275	95	95	115	119	83	85	142	142	212	212	242	242
G0218	Plumage	Su	114	120	192	192	373	373	120	120	156	156	210	210	245	245	275	275	95	95	119	119	87	87	142	142	212	212	242	242
G0219	Plumage	Su	116	120	190	192	373	373	120	120	156	156	210	210	233	233	271	275	95	95	119	119	87	87	142	142	212	212	250	250
G0220	Plumage	Ka	116	116	188	190	357	371	136	136	156	156	210	210	245	245	265	275	101	101	119	119	85	87	142	142	212	216	242	242
G0221	Plumage	Ka	116	120	186	188	371	371	120	120	156	158	210	218	245	245	265	275	95	95	119	119	87	87	142	142	206	212	242	242
G0222	Plumage	Ka	114	116	184	190	357	373	120	128	158	158	210	210	245	245	271	275	95	101	119	119	87	87	142	142	216	216	242	242
G0234	Plumage	La	116	124	190	192	371	373	120	120	156	156	210	224	243	243	275	275	101	101	119	119	85	87	142	142	212	216	242	242
G241	Blood	BK	116	116	190	192	353	371	120	120	154	156	210	210	245	245	265	271	95	101	119	119	87	87	142	142	212	212	236	236
G242	Blood	BK	116	120	192	192	371	371	108	120	156	156	210	210	245	245	265	265	95	95	119	119	83	85	142	142	212	212	242	242
G243	Blood	BK	116	116	190	190	371	371	108	136	156	156	210	242	245	245	271	275	95	95	119	119	85	87	142	142	212	212	242	242
G244	Blood	BK	116	120	184	190	371	371	108	120	156	156	210	210	245	245	271	275	95	95	119	119	87	87	142	142	206	212	236	236
G245	Blood	BK	116	120	190	190	371	371	108	108	154	158	210	210	245	245	275	277	95	101	119	119	85	87	142	142	212	212	242	242
G246	Blood	BK	116	120	186	192	369	371	108	120	154	158	210	242	245	245	265	271	95	101	119	119	87	87	142	142	212	212	242	242
G247	Blood	BK	116	116	188	192	353	371	108	120	158	158	210	210	245	245	265	265	95	95	119	119	85	87	142	142	206	212	242	242
G248	Blood	BK	116	120	190	190	371	371	120	120	158	184	210	210	245	245	265	275	95	95	119	119	83	87	142	142	212	212	242	242
G249	Blood	BK	120	120	190	192	371	371	108	120	158	184	210	210	245	245	265	271	95	101	119	119	87	87	142	142	212	212	242	242
G250	Blood	BK	116	116	188	190	353	371	120	120	158	158	210	210	245	245	271	275	95	95	119	119	85	85	142	142	206	212	242	242
G251	Blood	BK	116	116	190	192	371	371	108	108	156	156	210	242	245	245	271	277	95	95	119	119	83	87	142	142	206	212	242	242
G252	Blood	BK	116	116	190	192	371	371	108	108	156	156	210	210	245	245	275	275	95	101	119	119	83	87	142	142	212	212	242	242
G253	Blood	BK	116	116	192	192	353	371	120	120	158	158	210	210	245	245	275	275	95	95	119	119	87	87	142	142	212	212	242	242
G254	Blood	BK	120	120	188	188	371	371	108	120	158	158	210	210	245	245	271	275	101	101	119	123	87	87	142	142	206	212	242	242
G255	Blood	BK	116	116	190	192	371	371	108	120	158	184	210	210	245	245	271	275	95	95	119	119	87	87	142	142	206	212	236	236
G256	Blood	BK	116	116	188	192	371	371	108	120	154	158	210	210	245	245	265	271	95	101	119	119	83	87	142	142	212	212	242	242
G257	Blood	BK	116	120	184	192	371	371	108	120	158	158	210	210	245	245	275	275	101	101	119	119	87	87	142	142	206	212	242	242
G258	Blood	BK	120	120	184	192	353	353	108	120	156	158	210	210	245	245	265	271	95	101	119	119	85	87	142	142	206	212	242	242
G259	Blood	BK	116	116	190	192	353	353	108	108	156	156	210	210	245	245	275	275	95	95	119	119	87	87	142	142	206	212	242	242
G260	Blood	BK	116	116	188	188	371	371	108	120	158	158	210	210	245	245	275	275	95	101	119	119	83	87	142	142	212	212	242	242
G261	Blood	BK	116	116	190	190	353	371	120	136	156	156	210	210	245	245	275	275	101	101	119	119	87	87	142	142	212	212	242	242
G262	Blood	BK	116	120	190	192	353	373	108	120	156	158	210	210	245	245	265	277	95	95	119	119	83	85	142	142	212	212	236	236
G263	Blood	BK	116	120	190	190	353	371	120	120	156	156	210	210	245	245	271	271	101	101	119	119	83	85	142	142	206	212	236	236
G264	Blood	BK	116	116	180	190	353	371	120	120	158	184	210	210	245	245	275	275	95	101	119	119	83	87	142	142	212	212	242	242
G265	Blood	BK	116	120	190	190	371	371	108	120	158	158	210	210	245	245	271	277	95	101	119	119	85	87	142	142	212	212	242	242
G266	Blood	BK	116	120	188	192	371	371	120	120	158	158	210	210	245	245	275	275	95	95	119	119	83	87	142	142	212	212	242	242
G267	Blood	BK	116	116	188	190	353	371	120	120	158	158	210	210	245	245	275	275	95	95	119	119	83	85	142	142	212	212	242	242
G268	Blood	BK	116	116	188	190	371	371	108	112	156	156	210	210	245	245	275	275	95	101	119	119	87	87	142	142	212	212	242	242
G269	Blood	BK	116	120	192	192	371	373	108	120	156	156	210	236	245	245	271	275	101	101	119	119	87	87	142	142	206	212	242	242
G270	Blood	BK	116	116	190	190	353	371	108	120	156	156	210	210	245	245	271	275	95	101	119	119	87	87	142	142	212	212	242	242
G271	Blood	BK	116	116	190	192	353	371	108	108	158	158	210	210	245	245	271	275	95	95	119	119	83	87	142	142	206	212	242	242
G272	Blood	BK	116	120	188	192	371	371	108	120	156	156	210	210	245	245	265	271	95	101	119	119	83	87	142	142	206	212	242	242
G273	Blood	BK	116	116	190	192	371	371	120	120	154	158	210	210	245	245	271	277	95	95	119	119	83	85	142	142	212	212	236	236
G274	Blood	BK	116	116	190	192	353	353	108	120	158	184	210	210	245	245	271	275	95	95	119	119	83	87	142	142	206	212	242	242
G275	Blood	BK	119	119	190	192	353	371	108	108	154	158	210	210	245	245	275	275	101	101	119	119	83	87	142	142	206	212	242	242
G276	Blood	BK	116	116	190	190	353	371	120	120	156	156	210	236	245	245	265	271	95	95	119	119	85	87	142	142	212	212	236	236
G277	Blood	BK	116	116	190	192	371	373	108	136	156	158	210	210	245	245	265	277	95	101	119	119	85	85	145	145	212	212	242	242
G278	Blood	BK	116	116	184	190	353	371	120	120	158	158	210	210	245	245	271	275	101	101	119	119	83	85	142	142	206	212	242	242
G279	Blood	BK	116	116	190	190	371	373	108	120	156	158	210	210	245	245	275	275	95	101	119	119	87	87	142	142	212	212	242	242
G280	Blood	BK	116	116	192	192	371	373	120	120	156	158	210	210	245	245	271	275	95	101	119	119	83	87	142	142	212	212	242	242
G281	Blood	BK	116	116	190	190	353	373	108	120	158	184	210	210	245	245	275	277	95	101	119	119	87	87	142	142	212	212	242	242
G282	Blood	BK	116	116	188	188	353	373	108	120	154	156	210	242	245	245	271	275	95	95	119	119	85	87	142	142	212	212	242	242
G283	Blood	BK	116	116	190	192	371	373	108	120	156	158	210	242	245	245	275	275	95	95	119	119	85	87	142	142	212	212	242	242
G284	Blood	BK	116	120	184	192	353	371	120	120	158	158	210	210	245	245	265	371	95	101	119	119	87	87	142	142	212	212	242	242
G285	Blood	BK	116	116	190	192	253	371	120	120	158	184	210	210	245	245	275	275	95	101	119	119	87	87	142	142	212	212	236	236
G286	Blood	BK	116	116	190	192	371	371	108	120	156	158	210	210	245	245	271	275	101	101	119	119	83	87	142	142	206	212	242	242
G287	Blood	BK	116	116	188	192	353	353	108	120	156	158	210	210	245	245	265	275	95	95	119	119	87	87	142	142	212	212	242	242
G288	Blood	BK	116	116	190	192	371	371	108	120	158	158	210	210	245	245	265	265	95	101	119	119	87	87	142	142	212	212	236	236
G289	Blood	BK	116	116	188	188	356	356	120	120	158	158	210	210	245	245	271	275	95	101	119	119	87	87	142	142	212	212	242	242
G290	Blood	BK	116	116	188	190	371	373	120	136	156	156	210	210	245	245	265	271	101	101	119	123	87	87	142	142	212	212	236	236
G291	Blood	BK	116	116	190	192	371	373	108	120	156	158	210	210	245	245	275	277	95	95	119	119	83	85	142	142	212	212	242	242
G292	Blood	BK	116	116	188	192	353	353	108	120	158	158	210	210	245	245	265	271	101	101	119	119	83	87	142	142	212	212	242	242
G293	Blood	BK	116	120	188	192	371	373	120	120	154	158	210	210	245	245	271	275	101	101	119	119	83	85	142	142	212	212	236	236
G294	Blood	BK	116	116	190	192	371	371	108	108	158	184	210	210	245	245	265	275	95	95	119	119	83	83	142	142	212	212	242	242
G295	Blood	BK	116	120	188	192	369	373	108	120	158	158	210	210	245	245	265	275	101	101	119	119	87	87	142	142	212	212	236	236
G296	Blood	BK	116	120	184	188	373	373	120	136	156	158	210	210	245	245	271	275	95	101	119	119	87	87	142	142	212	212	236	236
G297	Blood	BK	116	116	190	190	353	373	108	120	158	184	210	210	245	245	271	277	95	101	119	119	83	87	142	142	212	212	242	242
G298	Blood	BK	116	116	190	190	371	373	108	108	156	158	210	210	245	245	265	275	95	95	119	119	85	87	142	142	206	212	242	242
G299	Blood	BK	116	116	188	188	371	371	120	120	158	158	210	210	245	245	265	265	95	95	119	119	85	87	142	142	212	212	242	242
G300	Blood	BK	116	116	190	190	371	373	108	108	156	156	210	210	245	245	271	275	95	95	119	119	87	87	142	142	212	212	242	242
G301	Blood	BK	116	120	188	190	353	373	108	108	154	156	210	210	245	245	265	275	101	101	119	119	85	87	142	142	206	212	242	242
G302	Blood	BK	116	116	188	188	371	371	120	120	158	158	210	210	245	245	271	275	95	95	119	119	83	85	142	142	212	212	242	242
G303	Blood	BK	120	120	192	192	371	371	108	120	156	156	210	210	245	245	265	375	101	101	119	119	85	87	142	142	212	212	236	236
G304	Blood	BK	116	116	184	190	353	371	108	120	158	158	210	210	245	245	265	271	95	101	119	119	85	87	142	142	212	212	242	242
G305	Blood	BK	116	120	184	188	353	371	108	108	158	158	210	210	245	245	275	275	95	95	119	119	85	87	142	142	206	212	242	242
G306	Blood	BK	116	116	188	190	353	373	108	108	156	158	210	210	245	245	275	277	101	101	119	119	83	87	142	142	212	212	236	236
G307	Blood	BK	116	116	188	190	371	373	120	120	154	154	210	210	245	245	265	275	101	101	119	119	87	87	142	142	212	212	242	242
G308	Blood	BK	116	116	188	190	371	371	108	120	158	158	210	210	245	245	271	277	101	101	119	119	83	87	142	142	212	212	236	236
G309	Blood	BK	116	116	190	192	371	371	120	120	158	158	210	210	245	245	265	275	95	101	119	119	85	87	142	142	212	212	242	242
G310	Blood	BK	116	116	190	192	371	373	120	120	154	158	210	210	245	245	265	275	101	101	119	119	85	87	142	142	212	212	242	242
G311	Blood	BK	116	116	190	194	371	373	120	120	154	154	210	210	245	245	271	275	101	101	119	119	85	87	142	142	212	212	242	242
G312	Blood	BK	116	116	190	192	353	373	120	120	158	158	210	210	245	245	275	275	95	95	119	119	87	87	142	142	212	212	242	242
G313	Blood	BK	116	116	188	194	371	371	120	120	156	156	210	210	245	245	265	275	101	101	119	119	87	87	142	142	212	212	242	242
G314	Blood	BK	116	116	188	192	367	373	120	120	156	158	210	210	245	245	265	275	95	101	119	119	85	87	142	142	212	212	236	236
G315	Blood	BK	116	116	188	192	371	371	120	120	156	158	210	210	245	245	265	275	95	95	119	119	83	83	142	142	206	212	236	236
G316	Blood	BK	116	116	190	192	371	371	120	136	154	158	210	210	245	245	265	271	95	101	119	119	97	97	142	142	212	212	242	242
G317	Blood	BK	116	116	190	192	371	373	120	136	158	158	210	210	245	245	265	271	95	95	119	119	85	87	142	142	212	212	242	242
G318	Blood	BK	116	116	190	192	371	373	120	120	158	158	210	210	245	245	271	275	95	101	119	119	85	87	142	142	212	212	242	242
G319	Blood	BK	116	116	188	192	367	371	108	120	154	156	210	210	245	245	265	275	101	101	119	119	85	85	142	142	206	216	242	242
G320	Blood	BK	116	116	190	190	353	371	120	136	158	158	210	210	245	245	275	275	101	101	119	119	87	87	142	142	212	212	242	242
G321	Blood	BK	116	116	190	192	371	371	120	136	156	158	210	210	245	245	275	275	95	101	119	119	87	87	142	142	206	212	242	242
G322	Blood	BK	116	116	188	192	353	371	136	136	158	158	210	242	245	245	271	275	95	95	119	119	83	87	142	142	212	212	242	242
G323	Blood	BK	116	116	190	192	371	371	120	120	158	158	210	210	245	245	275	275	95	101	119	119	85	87	142	142	212	212	242	242
G324	Blood	BK	116	116	190	192	371	371	120	120	156	156	210	210	245	245	275	275	101	101	119	119	85	87	142	142	212	212	242	242
G325	Blood	BK	116	116	190	190	373	373	120	120	156	158	210	210	245	245	265	275	95	101	119	119	85	87	142	142	212	212	242	242
G326	Blood	BK	116	116	192	194	371	371	120	120	158	158	210	210	245	245	275	275	101	101	119	119	87	87	142	142	212	212	242	242
G327	Blood	BK	116	116	188	190	371	373	120	120	154	154	210	210	245	245	271	275	95	101	119	119	87	87	142	142	212	212	242	242
G328	Blood	BK	116	116	192	192	371	373	120	136	154	156	210	210	245	245	271	275	101	101	119	119	83	85	142	142	212	212	242	242
G329	Blood	BK	116	116	190	192	371	371	120	120	154	156	210	210	245	245	271	275	95	101	119	119	87	87	142	142	212	212	242	242
G330	Blood	BK	116	116	190	192	371	373	120	120	154	154	210	210	245	245	275	275	101	101	119	119	83	87	142	142	212	212	242	242
G331	Blood	BK	116	116	190	190	371	371	120	120	158	158	210	210	245	245	265	275	95	101	119	119	83	83	142	142	212	212	242	242
G332	Blood	BK	116	116	190	192	353	371	120	120	154	158	210	210	245	245	265	275	101	101	119	119	87	87	142	142	206	212	242	242
G333	Blood	BK	116	116	190	192	353	353	120	120	154	154	210	210	245	245	275	275	101	101	119	119	85	87	142	142	206	212	242	242
G334	Blood	BK	116	116	190	192	371	373	120	120	158	158	210	210	245	245	365	375	95	101	119	119	85	85	142	142	212	212	242	242
G335	Blood	BK	116	116	190	192	371	371	120	120	156	158	210	210	245	245	275	275	95	95	119	119	87	87	142	142	212	212	242	242
G336	Blood	BK	116	116	188	190	353	367	120	120	158	158	210	210	245	245	275	275	95	101	119	119	83	87	142	142	212	212	236	236
G337	Plumage	Ro	116	120	188	192	353	371	108	120	158	158	210	210	245	245	265	275	95	101	119	119	87	87	142	142	212	212	242	242
G338	Plumage	Ro	116	116	184	192	353	371	120	120	158	158	210	210	245	245	265	275	95	101	119	119	87	87	142	142	212	214	242	242
G339	Plumage	Ro	116	116	184	194	367	371	118	120	156	156	210	210	245	245	275	277	95	95	119	119	85	85	142	142	212	214	242	242
G340	Plumage	Ro	116	116	188	192	371	371	120	120	156	156	210	236	245	245	275	275	95	101	119	119	85	85	142	142	212	212	242	242
G341	Plumage	Ro	116	116	184	194	371	373	108	120	156	158	210	210	245	245	275	275	101	101	119	119	83	85	142	142	212	212	242	242
G342	Plumage	Ro	116	116	184	194	353	371	108	120	158	158	210	218	245	245	265	275	95	101	119	119	85	87	142	142	206	216	242	242
G343	Plumage	Ro	116	120	184	188	353	371	120	120	156	156	210	210	245	245	275	275	95	101	119	119	87	87	142	142	212	212	242	242
G344	Plumage	Ro	116	116	184	194	353	373	120	136	158	158	210	210	245	245	275	275	101	101	119	119	85	87	142	142	212	212	242	242
G345	Plumage	Ro	116	116	184	192	371	371	120	120	156	156	210	210	245	245	265	275	95	95	119	119	83	87	142	142	212	212	242	242
G346	Plumage	Ro	116	116	190	192	353	371	120	120	156	156	210	210	245	245	265	275	101	101	119	119	87	87	142	142	212	216	242	242
G347	Plumage	Ro	116	116	188	188	371	371	120	120	156	158	218	236	245	245	275	275	95	95	119	119	87	87	142	142	212	216	242	242
G348	Plumage	Ro	116	116	184	188	371	371	120	120	156	158	210	236	245	245	275	275	101	101	119	119	85	87	142	142	212	212	240	240
G349	Plumage	Su	114	116	186	188	351	371	120	120	156	158	210	218	245	245	275	275	95	101	115	119	87	87	142	142	206	212	242	246
G350	Plumage	Su	114	120	186	196	365	371	120	120	156	158	210	210	245	245	271	271	95	101	119	119	87	87	142	142	212	212	242	242
G351	Plumage	Su	116	120	190	192	371	373	120	120	156	158	210	210	245	245	275	275	95	101	119	119	87	87	142	142	212	212	242	246
G352	Plumage	Su	114	120	186	190	371	373	120	120	158	158	210	245	245	245	265	275	101	101	119	119	87	87	142	142	212	212	242	242
G353	Plumage	Su	116	116	186	188	371	373	120	120	156	156	210	210	245	245	271	275	95	101	115	119	87	87	142	142	212	212	246	246
G354	Plumage	Su	120	120	186	192	353	371	108	120	156	156	210	210	245	245	265	275	95	101	119	119	85	87	142	142	212	212	242	242
G355	Plumage	Su	116	120	190	192	373	373	120	120	156	156	210	210	233	245	275	275	95	95	119	119	87	87	142	142	206	212	242	250
G356	Plumage	Su	114	116	186	186	353	371	120	120	156	156	210	210	245	245	265	275	95	101	119	119	87	87	142	142	212	216	242	242
G357	Plumage	Su	116	120	186	192	353	371	120	120	156	158	210	210	245	245	271	275	101	101	115	119	85	87	142	142	212	212	246	246
G358	Plumage	Su	114	116	192	192	365	371	120	120	156	158	210	216	245	245	265	271	95	101	119	119	87	87	142	142	212	212	242	242
G359	Plumage	Su	116	116	176	186	351	371	120	120	156	156	210	210	245	245	271	275	95	95	119	119	85	87	142	142	212	212	242	242
G360	Plumage	Su	120	122	186	186	365	371	120	120	156	158	210	210	245	245	265	271	101	101	119	119	85	87	138	142	206	212	242	242
G361	Plumage	Po	120	124	176	184	371	371	120	120	156	158	210	210	233	245	271	275	95	101	119	119	87	87	142	142	212	212	246	246
G362	Plumage	Po	116	120	188	192	361	367	120	120	156	158	210	210	245	245	271	271	95	101	119	119	85	87	142	142	206	216	242	242
G363	Plumage	Po	122	124	184	196	353	371	120	120	156	156	210	210	245	245	265	271	101	101	115	119	87	87	142	142	206	212	246	246
G364	Plumage	Po	116	116	186	190	371	373	108	120	156	158	210	210	233	233	275	275	95	101	119	119	87	87	142	142	206	206	242	242
G365	Plumage	Po	116	116	188	194	371	373	120	120	156	156	210	236	245	245	265	275	95	101	119	119	87	87	142	142	212	216	242	242
G367	Plumage	Po	116	124	190	192	367	371	120	120	156	156	210	210	245	245	265	271	95	101	119	119	87	87	142	142	206	206	246	246
G368	Plumage	Po	116	124	176	190	367	371	120	120	156	156	242	242	233	233	365	371	95	95	119	119	87	87	142	142	206	212	246	246
G369	Plumage	Po	120	124	192		353	371	120	120	156	156	210	242	245	245	265	271	101	101	119	119	87	87	142	142	206	212	242	242
G370	Plumage	Po	114	116	184	188	367	371	120	120	156	156	210	210	233	245	271	271	95	101	119	119	87	87	142	142	206	212	246	246
G371	Plumage	Po	116	124	184	188	367	367	120	120	156	156	210	236	233	245	271	275	101	101	119	119	85	87	142	142	206	212	246	246
G373	Plumage	Lu	116	116	188	190	371	371	120	120	156	156	210	210	237	237	271	275	101	101	119	119	83	87	142	142	206	218	242	242
G374	Plumage	Lu	116	116	188	190	371	371	120	120	158	158	210	210	245	245	275	275	101	101	119	123	85	87	146	154	216	216	242	242
G375	Plumage	Lu	116	116	186	188	353	371	120	120	156	158	210	210	245	245	265	271	101	101	119	119	83	87	142	142	206	216	242	246
G376	Plumage	Lu	116	116	186	188	371	371	108	120	158	158	210	210	237	237	265	265	85	101	119	119	85	87	142	142	216	218	242	242
G377	Plumage	Lu	116	122	188	190	371	371	108	120	156	156	210	210	245	245	271	271	101	101	119	119	85	87	142	142	216	216	242	242
G378	Plumage	Lu	116	116	184	192	371	371	120	120	156	158	210	210	245	245	271	271	95	101	119	119	83	87	142	142	206	216	242	246
G379	Plumage	Lu	116	120	188	192	371	373	120	120	156	158	210	216	245	245	265	275	95	101	119	119	83	85	142	142	216	216	242	242
G380	Plumage	Lu	114	116	182	190	353	371	120	120	156	156	210	210	245	245	265	275	101	101	119	119	83	85	142	142	206	206	242	242
G381	Plumage	Lu	116	116	192	192	371	371	108	120	158	158	210	210	245	245	273	275	101	101	119	119	83	87	142	142	216	216	242	246
G382	Plumage	Lu	122	122	190	192	367	367	108	128	156	156	210	210	245	245	271	275	95	101	115	115	87	87	134	142	206	216	240	240
G383	Plumage	Lu	116	116	184	192	371	371	120	120	158	158	210	210	245	245	265	273	95	101	119	119	85	87	142	142	218	218	242	242
G384	Plumage	Lu	116	122	186	190	353	367	128	136	156	156	210	210	233	233	271	275	95	101	115	119	87	87	134	142	206	212	242	242
G385	Plumage	Ka	114	116	184	190	371	371	120	136	158	158	210	210	245	245	265	275	101	101	119	119	87	87	134	134	206	206	246	246
G386	Plumage	Ka	116	124	188	192	361	375	120	136	156	158	210	210	245	245	271	275	101	101	119	119	87	87	142	142	206	206	242	242
G387	Plumage	Ka	114	116	190	190	357	371	108	120	158	158	210	210	245	245	265	275	95	101	119	119	87	87	134	142	206	212	246	246
G388	Plumage	Ka	116	116	184	190	357	371	120	136	156	156	210	210	245	245	271	275	95	101	119	119	85	87	142	142	206	212	242	242
G389	Plumage	Ka	116	116	184	188	371	373	120	120	158	158	218	218	245	245	271	271	95	101	119	119	85	87	134	142	212	216	246	250
G392	Plumage	Ka	116	116	184	184	353	375	120	136	158	158	210	210	245	245	275	275	95	101	119	119	85	87	142	142	206	216	242	242
G393	Plumage	Ka	116	116	184	188	375	375	108	120	158	158	210	218	245	245	265	275	101	101	119	119	87	87	142	142	206	206	242	250
G394	Plumage	Ka	116	116	188	190	371	373	120	136	158	158	210	210	245	245	271	271	101	101	119	123	87	87	134	142	206	212	242	242
G395	Plumage	Ka	114	124	188	188	371	371	120	120	156	156	210	210	245	245	265	275	95	101	119	119	87	87	142	142	206	212	242	242
G396	Plumage	Ka	116	116	190	190	375	371	136	136	158	158	210	210	245	245	265	271	101	101	119	119	87	87	142	142	206	212	242	242
G397	Plumage	Ga	114	146	176	176	375	375	108	108	156	162	218	226	247	247	271	275	89	95	115	119	83	83	142	142	212	212	242	242
G398	Plumage	Ga	116	116	176	198	371	375	108	120	158	162	210	210	247	247	275	275	89	89	119	123	83	83	142	154	212	216	240	242
G399	Plumage	Ga	114	116	190	198	367	375	120	120	154	156	210	228	247	247	275	275	89	95	119	123	81	83	142	142	210	216	242	242
G400	Plumage	Ga	116	116	176	178	351	375	108	108	156	162	226	228	247	247	271	271	89	95	119	123	83	87	142	154	212	212	236	236
G401	Plumage	Ga	116	116	176	176	351	375	108	108	154	156	218	226	247	247	271	275	89	89	119	123	83	83	146	154	210	210	240	240
G402	Plumage	Ga	116	116	176	176	351	375	120	120	156	156	218	218	247	247	271	275	89	89	123	123	83	87	146	154	210	210	242	242
G403	Plumage	Ga	114	116	190	198	375	375	108	108	156	162	226	228	247	247	269	275	89	95	115	119	83	83	142	154	210	216	242	242
G404	Plumage	Ga	116	116	176	176	361	375	108	108	154	162	210	228	247	247	269	271	89	95	115	123	81	83	154	154	210	212	242	242
G405	Plumage	Ga	116	116	176	176	351	361	108	108	158	162	216	218	247	247	269	275	89	95	119	119	81	87	142	154	212	218	242	242
G406	Plumage	Ga	114	116	176	176	351	367	108	108	156	158	216	228	247	247	269	271	89	95	119	119	79	83	142	142	214	216	236	242
G407	Plumage	Ga	116	116	176	176	351	351	108	108	156	162	210	210	247	247	269	275	89	101	119	123	81	83	142	154	212	216	242	242
G408	Plumage	Ga	116	116	176	198	361	361	108	108	156	162	218	228	247	247	269	275	89	95	119	123	81	83	146	146	212	216	236	236
G409	Plumage	Sl	116	120	176	188	371	371	120	120	156	156	210	210	245	245	271	271	95	101	115	119	87	89	142	142	212	216	246	246
G410	Plumage	Sl	116	116	192	194	353	371	120	120	156	158	210	210	245	245	275	275	95	101	119	119	85	87	142	142	206	212	242	242
G411	Plumage	Sl	116	116	186	198	371	371	120	120	156	156	210	210	245	245	273	275	95	95	119	119	87	87	142	142	206	206	246	246
G412	Plumage	Sl	116	116	192	194	353	371	120	120	156	158	210	242	233	245	275	275	95	101	119	119	87	89	142	142	206	212	246	246
G413	Plumage	Sl	114	120	176	184	371	371	120	120	156	156	210	210	233	233	273	275	95	101	119	119	85	87	142	142	206	212	240	240
G414	Plumage	Sl	116	120	176	188	353	371	108	120	156	162	210	210	245	245	273	273	95	101	115	119	87	89	142	142	206	212	242	242
G415	Plumage	Sl	116	120	176	192	353	371	108	120	158	158	210	210	245	245	273	275	95	101	119	119	87	87	142	146	206	206	242	242
G416	Plumage	Sl	116	116	184	192	371	371	120	120	158	158	210	236	245	245	269	271	95	95	119	119	87	89	142	142	212	212	246	246
G417	Plumage	Sl	116	116	176	192	353	371	108	120	156	156	210	242	245	245	271	275	95	95	119	119	87	87	142	142	206	212	246	246
G418	Plumage	Sl	114	116	176	184	371	371	120	120	156	158	210	210	245	245	273	275	101	101	119	119	87	87	142	142	212	216	242	242
G419	Plumage	Sl	116	120	194	194	371	371	120	120	158	158	210	236	233	233	275	275	95	101	119	119	87	87	142	142	206	212	246	246
G420	Plumage	Sl	116	116	184	198	353	371	120	120	156	156	210	210	245	245	271	275	95	95	119	119	85	87	142	142	212	212	246	246
G421	Plumage	Ku	116	116	198	198	361	365	108	108	162	162	218	226	247	247	269	269	89	95	119	119	79	83	142	146	216	216	236	240
G422	Plumage	Ku	116	116	198	198	361	371	108	108	162	162	218	218	247	247	269	269	89	95	119	123	79	83	142	150	212	214	240	240
G423	Plumage	Ku	116	116	198	256	351	365	108	120	154	162	226	228	247	247	269	269	95	95	119	123	83	83	146	158	216	216	236	236
G424	Plumage	Ku	116	120	198	256	365	365	108	108	162	162	228	228	247	247	269	269	89	95	123	123	81	87	158	158	214	214	236	240
G425	Plumage	Ku	116	120	198	198	365	365	108	108	154	162	226	228	247	247	269	275	89	89	123	123	83	87	158	158	210	214	240	240
G426	Plumage	Ku	116	116	198	198	361	365	108	120	162	162	226	228	247	247	269	275	89	89	119	123	93	93	138	150	216	216	240	240
G427	Plumage	Ku	116	120	198	198	365	365	108	108	154	162	228	228	247	247	269	269	85	85	123	123	79	83	138	142	212	214	240	240
G428	Plumage	Ku	116	116	198	198	351	365	108	108	162	162	218	228	247	247	269	269	89	95	119	123	79	83	142	158	212	214	236	236
G429	Plumage	Ku	116	116	176	176	365	365	108	108	154	162	228	228	247	247	269	269	89	95	119	123	83	91	146	150	214	214	236	236
G430	Plumage	Ku	116	116	198	256	351	365	108	120	162	162	228	228	247	247	269	269	95	95	119	123	81	83	146	158	212	216	236	236
G431	Plumage	Ku	116	116	198	256	365	365	108	120	162	162	218	230	247	247	269	269	89	95	119	119	81	87	138	142	216	216	236	236
G432	Plumage	Ku	116	116	198	198	351	365	120	120	154	162	226	228	247	247	269	269	89	95	123	123	79	79	150	158	212	214	236	240
G433	Plumage	Ki	116	116	186	190	371	371	120	136	156	158	210	210	245	247	275	275	101	101	119	119	85	87	142	142	212	212	242	242
G434	Plumage	Ki	114	116	186	190	373	373	120	136	158	158	210	210	237	245	265	265	101	101	119	119	85	87	142	142	216	216	242	246
G435	Plumage	Ki	114	120	188	190	357	371	108	120	158	162	210	242	245	245	269	275	95	101	119	119	87	87	142	142	212	212	242	242
G436	Plumage	Ki	116	124	182	188	353	371	136	136	156	158	210	242	233	233	269	275	95	95	119	119	81	87	142	142	206	206	242	242
G437	Plumage	Ki	120	124	186	190	357	371	108	108	158	158	210	210	245	245	275	275	95	101	119	119	85	85	142	142	216	216	246	246
G438	Plumage	Ki	116	120	186	192	357	371	128	128	158	158	210	218	233	233	265	275	95	101	119	119	85	85	142	142	212	216	242	246
G439	Plumage	Ki	120	124	190	192	357	371	120	136	156	156	210	242	237	245	271	275	95	95	119	119	85	87	142	142	212	216	242	246
G440	Plumage	Ki	116	124	190	190	353	371	120	136	156	158	210	210	245	245	265	275	95	101	119	119	85	87	142	142	212	216	242	242
G441	Plumage	Ki	120	124	184	192	371	373	108	120	158	162	210	242	245	245	275	275	95	95	119	119	81	85	142	142	206	216	246	246
G442	Plumage	Ki	116	116	184	184	371	377	108	120	156	156	210	210	245	245	275	275	95	101	119	119	87	87	142	142	212	216	246	246
G443	Plumage	Ki	116	124	186	186	353	371	136	136	156	156	210	210	245	245	265	275	101	101	119	119	87	87	142	142	212	216	242	242
G444	Plumage	Ki	116	124	186	192	353	371	108	136	156	158	210	210	233	245	265	275	95	101	119	119	87	87	142	142	216	216	242	246
G445	Plumage	La	116	116	190	190	373	375	120	120	156	158	210	210	243	245	275	275	95	101	119	119	83	87	142	142	212	218	242	242
G446	Plumage	La	114	116	192	200	367	375	120	120	156	158	210	210	243	243	275	275	101	101	119	119	83	85	142	142	212	212	242	242
G447	Plumage	La	116	116	190	192	371	373	120	120	158	158	210	242	245	245	275	275	95	101	119	119	83	87	142	142	206	212	242	242
G448	Plumage	La	116	124	192	194	373	373	120	120	156	158	210	210	243	243	271	275	101	101	119	119	85	87	142	142	212	212	242	242
G449	Plumage	La	116	116	190	194	371	373	120	120	156	156	210	224	243	243	275	275	101	101	119	119	83	87	142	142	218	218	242	242
G450	Plumage	La	116	124	190	192	367	371	120	120	156	156	210	210	245	245	275	275	101	101	119	119	83	87	142	142	218	218	242	242
G451	Plumage	La	114	124	190	194	371	373	120	120	156	156	210	210	243	243	275	275	101	101	119	119	89	89	142	142	206	212	242	242
G452	Plumage	La	116	116	192	196	367	375	120	120	156	156	210	210	245	245	275	275	101	101	119	119	87	87	142	142	212	218	242	242
G453	Plumage	La	116	116	190	190	367	371	120	120	156	158	210	214	243	243	271	275	95	101	119	119	85	87	142	142	212	216	242	242
G454	Plumage	La	114	116	194	194	371	371	120	120	156	156	210	210	245	245	275	275	95	101	119	119	89	89	142	142	206	218	242	242
G455	Plumage	La	116	124	194	200	375	375	120	120	156	156	210	210	243	245	265	275	101	101	119	119	87	87	142	142	212	216	242	242
G456	Plumage	La	116	116	194	194	371	373	120	120	156	156	210	210	245	245	275	275	101	101	119	119	85	87	142	142	212	216	242	242
G457	Plumage	Pd	124	124	184	188	371	371	136	136	156	158	210	218	233	245	271	275	101	101	119	119	85	87	142	142	206	212	242	246
G458	Plumage	Pd	116	116	184	186	353	375	108	120	156	156	210	210	245	245	271	271	101	101	119	119	87	87	142	142	206	212	246	246
G459	Plumage	Pd	116	116	188	190	361	371	120	136	156	156	210	210	245	245	275	275	95	101	119	119	85	85	142	142	212	216	242	242
G460	Plumage	Pd	114	114	186	186	353	357	108	120	156	156	210	210	245	245	265	265	101	101	119	119	85	87	134	142	206	212	242	246
G461	Plumage	Pd	114	116	188	190	353	371	120	120	156	156	210	210	245	245	275	275	101	101	119	119	85	85	142	142	212	216	242	242
G462	Plumage	Pd	114	116	184	188	357	371	120	136	156	156	210	210	245	245	271	271	101	101	119	119	85	87	142	142	206	212	240	240
G463	Plumage	Pd	116	116	190	190	371	375	120	120	156	156	210	210	245	245	275	275	95	101	119	119	85	87	142	142	212	212	240	240
G464	Plumage	Pd	116	116	184	186	351	371	120	136	156	156	210	210	245	245	271	271	101	101	119	119	85	85	142	142	212	216	242	242
G465	Plumage	Pd	114	116	184	190	353	371	120	120	156	156	210	218	233	233	271	271	95	101	119	119	85	87	142	142	212	216	242	242
G466	Plumage	Pd	116	116	176	190	357	371	120	120	156	156	210	210	245	245	271	275	101	101	119	119	87	87	142	142	206	212	242	242
G467	Plumage	Pd	116	124	186	188	371	371	136	136	156	158	210	210	245	245	271	275	101	101	119	119	87	87	142	142	206	206	242	246
G468	Plumage	Pd	116	116	184	188	361	373	120	136	158	158	210	218	245	245	271	271	95	95	119	119	85	87	142	142	206	206	242	242
G469	Plumage	Ry	116	120	186	190	369	371	120	120	158	158	210	210	247	247	271	275	95	95	119	119	87	87	142	142	216	216	242	242
G470	Plumage	Ry	116	122	187	190	357	371	108	120	156	158	210	210	245	245	265	275	101	101	119	119	85	87	142	142	212	212	242	242
G471	Plumage	Ry	116	122	186	190	371	373	120	128	158	158	210	210	247	247	265	275	95	95	119	119	87	87	142	142	206	216	242	242
G472	Plumage	Ry	114	120	190	190	371	371	120	120	158	158	210	210	245	245	265	271	101	101	119	119	87	87	138	142	212	216	242	242
G473	Plumage	Ry	114	116	188	190	371	375	108	120	156	156	210	210	245	245	271	275	95	101	119	119	87	87	138	142	216	216	242	242
G474	Plumage	Ry	116	116	186	186	371	373	120	120	156	156	210	210	245	245	265	271	101	101	119	119	83	87	142	142	212	218	242	242
G475	Plumage	Ry	116	120	184	186	375	375	120	120	156	156	210	210	237	237	271	275	95	95	119	119	87	87	142	142	216	216	242	242
G476	Plumage	Ry	116	120	176	192	357	371	108	128	156	156	210	210	245	245	271	275	95	101	119	119	87	87	142	142	212	212	242	242
G477	Plumage	Ry	116	116	186	190	371	371	120	120	156	158	210	218	237	237	271	275	95	95	119	119	83	87	142	142	206	216	246	246
G478	Plumage	Ry	116	120	190	194	357	371	120	120	156	158	210	210	233	233	271	275	95	95	119	119	87	87	142	142	212	212	242	242
G479	Plumage	Ry	116	116	190	190	371	375	120	120	156	158	210	236	233	233	275	275	95	101	119	119	85	87	142	142	212	212	242	242
G480	Plumage	Ry	116	116	190	190	371	371	120	120	156	156	210	210	245	245	271	275	95	101	119	123	87	87	142	142	212	212	242	242
	Table S1. Genotyping data

## Sheet: Table S2. Number of alles
Population	Bca µ1	TTUCG5	CKW21	Bca µ9	Bca µ8	Ans02	Ans18	Ans25	CAUD-G013	CAUD-G007	Aal µ1	Afa35	CAUD-G012	Ans07	Mean
BK	5	12	13	8	4	9	5	6	3	3	7	8	8	5	6.857
Ki	4	11	8	3	3	6	2	4	3	3	6	5	5	5	4.857
Pd	4	5	5	4	4	4	2	4	2	2	3	1	3	2	3.214
Ga	3	5	3	4	4	2	1	4	2	1	3	2	2	2	2.714
Po	2	4	6	3	4	2	1	5	2	2	3	1	2	2	2.786
Ry	2	5	4	3	3	2	1	5	2	1	4	1	3	2	2.714
La	2	5	4	4	3	3	1	6	2	1	3	1	4	2	2.929
Lu	5	8	7	2	2	6	2	5	2	2	2	2	3	4	3.714
Su	5	6	7	4	2	4	3	4	3	3	3	4	4	4	4
Ka	5	9	6	3	4	6	3	5	3	3	6	3	6	4	4.714
Ro	3	9	7	3	4	7	4	5	4	2	8	5	5	4	5
Sł	4	9	7	4	3	5	4	4	2	1	5	1	4	2	3.929
Ku	5	8	8	4	2	3	4	3	2	2	3	3	4	3	3.857
Mean	3.769	7.385	6.538	3.769	3.231	4.538	2.538	4.615	2.462	2	4.308	2.846	4.077	3.154	-
No.of diffrent alleles	7	16	15	9	4	14	5	8	4	3	10	10	8	5	-
		Table S2. Number of different of alleles at 14 microsatellite loci
